# Supplementary material for: Enhanced transparent conducting performance of c-axis oriented Ca3Co4O9 thin films
Source: Royal Society of Chemistry journal article supplement (doi:10.1039/c4ra16187d), 2015-01-01
Supplement: c4ra16187d1.pdf [file c4ra16187d1.pdf]

Table 1: Comparison of the figure of merit  $FOM$  for  $\text{Ca}_3\text{Co}_4\text{O}_9$  with published data for other p-type TCOs and some typical n-type TCOs.

| Films                                                  | $FOM$<br>( $\text{M}\Omega$ ) <sup>-1</sup> | Reference                                           | Growth technique    |
|--------------------------------------------------------|---------------------------------------------|-----------------------------------------------------|---------------------|
| $\text{In}_2\text{O}_3:\text{Sn}$ / n-type             | 227894                                      | <i>J. Appl. Phys.</i> 86, 6451 (1999)               | PLD                 |
| $\text{In}_2\text{O}_3:\text{Zr}$ /n-type              | 686496                                      | <i>Appl. Phys. Lett.</i> 78,1050(2001)              | PLD                 |
| $\text{CdO:F}$ /n-type                                 | 861957                                      | <i>Thin Solid Films</i> 347, 295(1999)              | Spray pyrolysis     |
| $\text{ZnO:Al}$ /n-type                                | 24537                                       | <i>J. Appl. Phys.</i> 99,124505 (2006)              | Sputtering          |
| $\text{SnO}_2:\text{F}$ /n-type                        | 3076565                                     | <i>J. Appl. Phys.</i> 83.1049(1998)                 | Spray pyrolysis     |
| $\text{SnO}_2:\text{Zn}$ /p-type                       | 106.2                                       | <i>J. Inorg. Organomet. Polym.</i> 22, 21(2012)     | Sputtering          |
| $\text{SnO}_2:\text{Sb}$ /p-type                       | 64.5                                        | <i>Appl. Surf. Sci.</i> 286, 417 (2013)             | PLD                 |
| $\text{Cr}_2\text{O}_3(\text{Mg, N})$ /p-type          | 7.2                                         | <i>Appl. Phys. Lett.</i> 99, 111910 (2011)          | Spray pyrolysis     |
| $\alpha\text{-Cr}_2\text{O}_3:\text{N}$ /p-type        | 0.2                                         | <i>Sol. Energy Mater. Sol. Cells</i> 95, 1005(2011) | sputtering          |
| $\text{CuAlO}_2$ /p-type                               | 50                                          | <i>Nature</i> 389, 939 (1997)                       | PLD                 |
| $\text{CuAlO}_2$ /p-type                               | 46.9                                        | <i>J. Cryst. Growth</i> 328 25 (2011)               | Sputtering          |
| $\text{CuCr}_{0.97}\text{Mg}_{0.03}\text{O}_2$ /p-type | 1637                                        | <i>Thin Solid Films</i> 517, 3211 (2009)            | PLD                 |
| $\text{CuCr}_{1-x}\text{Mg}_x\text{O}$ /p-type         | 5000                                        | <i>J. Appl. Phys.</i> 89, 8022 (2001)               | Sputtering          |
| $\text{CuScO}_{2+x}$ /p-type                           | 270                                         | <i>Appl. Phys. Lett.</i> 77, 1325 (2000)            | Sputtering          |
| $\text{CuGaO}_2$ /p-type                               | 14                                          | <i>J. Appl. Phys.</i> 89, 1790 (2001)               | PLD                 |
| $\text{CuYO}_2$ /p-type                                | 1                                           | <i>Thin Solid Films</i> 397, 244 (2001)             | Co-evaporation      |
| $\text{AgCoO}_2$ /p-type                               | 4.4                                         | <i>Thin Solid Films</i> 411, 119 (2002)             | Sputtering          |
| $\text{Bi}_2\text{Sr}_2\text{Co}_2\text{O}_y$ /p-type  | 800                                         | <i>Chem. Commun.</i> 50, 1854 (2014)                | Solution processing |
| $\text{Ca}_3\text{Co}_4\text{O}_9$ /p-type             | 151                                         | <i>Appl. Phys. Lett.</i> 104, 161901 (2014)         | Solution processing |
| $\text{Ca}_3\text{Co}_4\text{O}_9$ /p-type             | 988                                         | <b>This paper</b>                                   | PLD                 |
